# Supplementary material for: [Retracted] Might Patients with Metastatic Gastrointestinal Stromal Tumors Benefit from Operative Management? A Population‐Based Retrospective Study
Source: Hindawi journal article supplement (doi:10.1155/2022/9432410), 2022-01-01
Supplement: f1 [file 9432410.f1.docx]

**Table S1** Characteristics of mGISTs patients in training and validation cohorts

| Characteristic | No. (%) of Patients | | *P* value |
| --- | --- | --- | --- |
| Training  (n=224) | Validation  （n=112） |
| Age at diagnosis, y |  |  | 0.876 |
| <40 | 15(6.7) | 7(6.3) |  |
| ≥40 | 209(93.3) | 105(93.7) |  |
| Gender |  |  | 0.102 |
| Male | 119(53.1) | 70(62.5) |  |
| Female | 105(46.9) | 42(37.5) |  |
| Race |  |  | 0.301 |
| White | 160(71.4) | 88(78.6) |  |
| Black | 32(14.3) | 14(12.5) |  |
| Other | 32(14.3) | 10(8.9) |  |
| Marital status |  |  | 0.180 |
| married | 141(62.9) | 62(55.4) |  |
| unmarried | 83(37.1) | 50(44.6) |  |
| Tumor site |  |  | 0.708 |
| Stomach | 101(45.1) | 47(42.0) |  |
| Small intestine | 87(38.8) | 42(37.5) |  |
| Other digestive organs | 23(10.3) | 13(11.6) |  |
| Non-digestive organs | 13(5.8) | 10(8.9) |  |
| Tumor size, cm |  |  | 0.829 |
| <2 | 3(1.3) | 3(2.7) |  |
| 2-4.9 | 18(8.0) | 9(8.0) |  |
| 5-9.9 | 65(29.0) | 34(30.4) |  |
| ≥10 | 138(61.6) | 66(58.9) |  |
| Grade |  |  | 0.202 |
| Poor differentiated or undifferentiated | 146(65.2) | 65(58.0) |  |
| Well or moderately differentiated | 78(34.8) | 47(42.0) |  |
| Chemotherapy |  |  | 0.271 |
| Yes | 187(83.5) | 88(78.6) |  |
| No/unknown | 37(16.5) | 24(21.4) |  |
